# Supplementary material for: Structural Basis of the γ-Lactone-Ring Formation in Ascorbic Acid Biosynthesis by the Senescence Marker Protein-30/Gluconolactonase
Source: PubMed Central journal article supplement (PMC3551927; doi:10.1371/journal.pone.0053706), 2013-01-22
Supplement: pone.0053706.s004.pdf [file pone.0053706.s004.pdf]

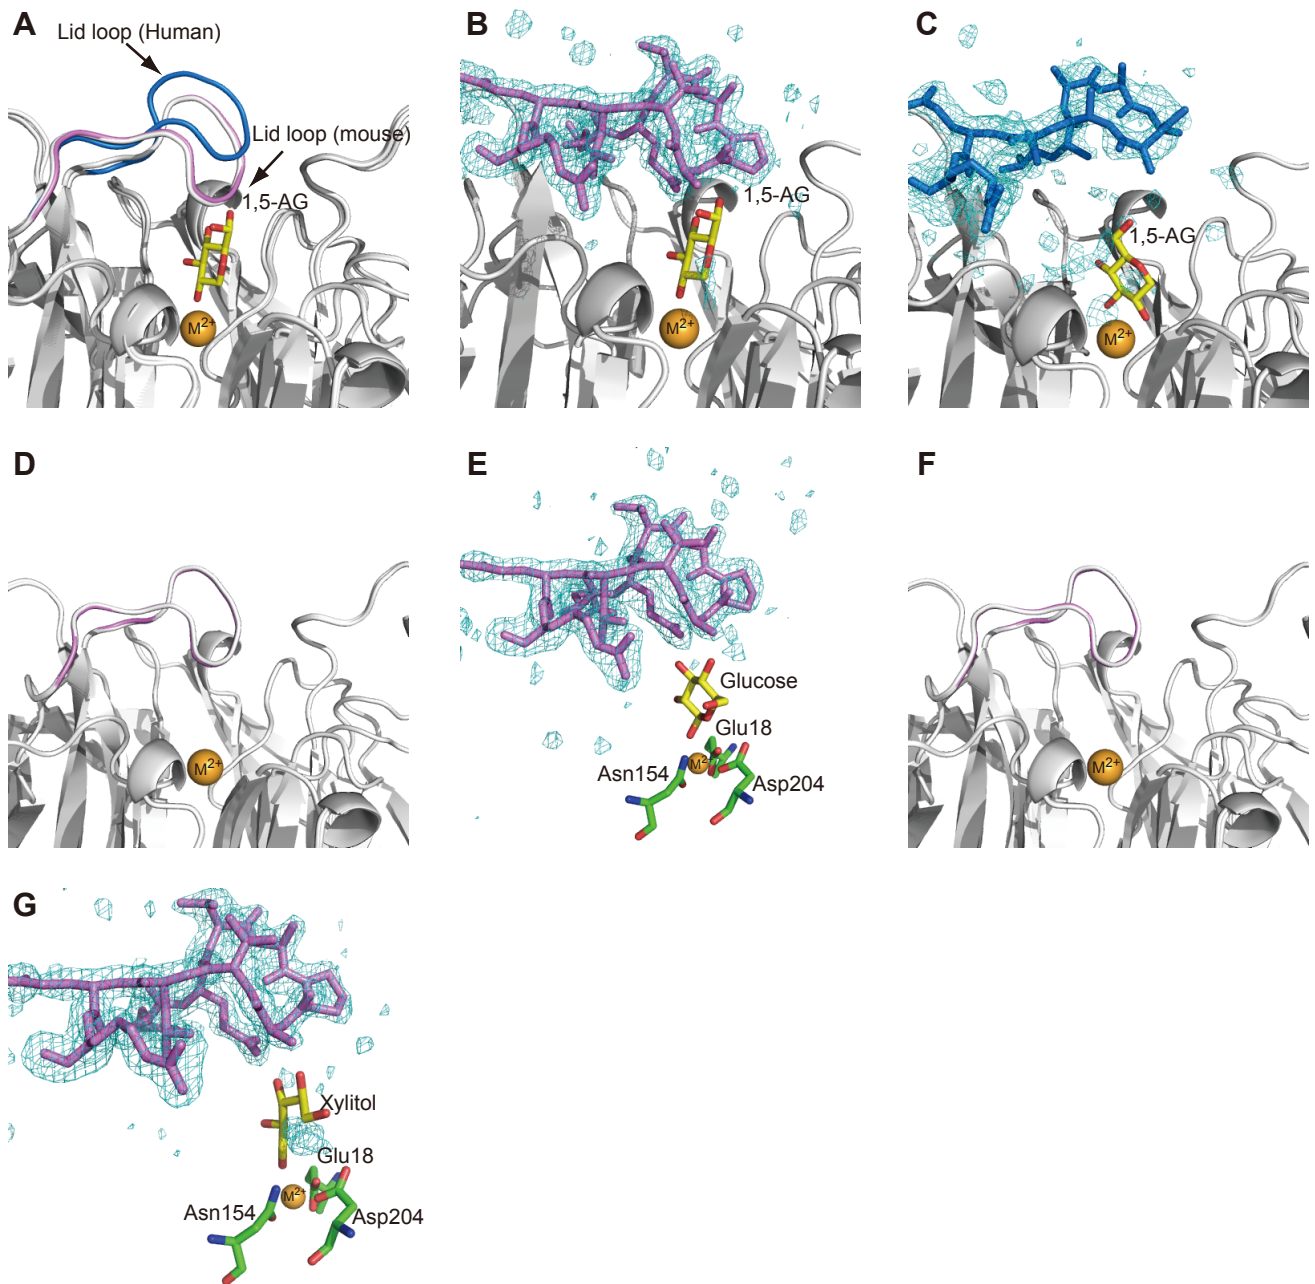

Figure S4
