# Supplementary material for: Structural Basis of the γ-Lactone-Ring Formation in Ascorbic Acid Biosynthesis by the Senescence Marker Protein-30/Gluconolactonase
Source: PubMed Central journal article supplement (PMC3551927; doi:10.1371/journal.pone.0053706), 2013-01-22
Supplement: pone.0053706.s009.pdf [file pone.0053706.s009.pdf]

**Table S1.** GNL activity of crude extract from *E. coli* with and without SMP30/GNL gene

| <i>E. coli</i> /expression vector                     | GNL activity ( $\mu\text{mol}/\text{min}/\text{mg}$ ) |
|-------------------------------------------------------|-------------------------------------------------------|
| BL21(DE3)-Rossetta2/pLysS [pET21b(+)]                 | N.D.*                                                 |
| BL21(DE3)-Rossetta2/pLysS [pET21b(+)/human SMP30/GNL] | $25 \pm 0.3$                                          |
| BL21(DE3) [pET21b(+)]                                 | N.D.                                                  |
| BL21(DE3) [pET21b(+)/mouse SMP30/GNL]                 | $8.8 \pm 0.4$                                         |

N.D.: No GNL activity was detected.
