# Supplementary material for: Structural Basis of the γ-Lactone-Ring Formation in Ascorbic Acid Biosynthesis by the Senescence Marker Protein-30/Gluconolactonase
Source: PubMed Central journal article supplement (PMC3551927; doi:10.1371/journal.pone.0053706), 2013-01-22
Supplement: pone.0053706.s010.pdf [file pone.0053706.s010.pdf]

**Table S2.** Effect of crude extract on the GNL activity of SMP30/GNL

|                 | Crude extract* ( $\mu\text{g}^\dagger$ )              |              |              |              |
|-----------------|-------------------------------------------------------|--------------|--------------|--------------|
|                 | 0.1                                                   | 1            | 5            | 10           |
|                 | GNL activity ( $\mu\text{mol}/\text{min}/\text{mg}$ ) |              |              |              |
| Human SMP30/GNL | 681 $\pm$ 45                                          | 681 $\pm$ 36 | 692 $\pm$ 45 | 654 $\pm$ 49 |
| Mouse SMP30/GNL | 723 $\pm$ 65                                          | 667 $\pm$ 40 | 692 $\pm$ 52 | 739 $\pm$ 51 |

\* Crude extract was prepared from *E. coli* without SMP30/GNL gene.

$\dagger$  Total amount of proteins in the crude extract was estimated by the Bradford method using bovine serum albumin as a standard.
