# Supplementary material for: Structural Basis of the γ-Lactone-Ring Formation in Ascorbic Acid Biosynthesis by the Senescence Marker Protein-30/Gluconolactonase
Source: PubMed Central journal article supplement (PMC3551927; doi:10.1371/journal.pone.0053706), 2013-01-22
Supplement: pone.0053706.s011.pdf [file pone.0053706.s011.pdf]

**Table S3.** Divalent metal ion contents in the purified human and mouse SMP30/GNL

|                                                     | Mouse <sup>*1</sup> |          |                    | Human <sup>*1</sup> |          |          |
|-----------------------------------------------------|---------------------|----------|--------------------|---------------------|----------|----------|
| Sample <sup>*2</sup>                                | Purified            | Dialyzed | Chelated           | Purified            | Dialyzed | Chelated |
| Protein conc. (mg/ml)                               | 1.2                 | 0.5      | 0.8                | 1.2                 | 1.2      | 1.2      |
| Concentration ( $\mu\text{M}$ ) <sup>*3</sup>       |                     |          |                    |                     |          |          |
| Mg <sup>2+</sup>                                    | 7.0                 | N.D.     | 0.29               | 5.4                 | N.D.     | N.D.     |
| Ca <sup>2+</sup>                                    | 18.0                | 0.75     | 0.97               | 17.0                | 1.85     | 0.87     |
| Mn <sup>2+</sup>                                    | 0.35                | 0.04     | N.D. <sup>*4</sup> | 0.16                | 0.27     | N.D.     |
| Zn <sup>2+</sup>                                    | 0.55                | 0.55     | N.D.               | 1.10                | N.D.     | N.D.     |
| Metal ions per purified SMP30/GNL (%) <sup>*5</sup> |                     |          |                    |                     |          |          |
| Mg <sup>2+</sup>                                    | 19                  | N.D.     | 1                  | 15                  | N.D.     | N.D.     |
| Ca <sup>2+</sup>                                    | 51                  | 5        | 4                  | 46                  | 3.9      | 1.9      |
| Mn <sup>2+</sup>                                    | 1.0                 | 0.2      | N.D.               | 0.5                 | 0.6      | N.D.     |
| Zn <sup>2+</sup>                                    | 1.5                 | 3.7      | N.D.               | 3.0                 | N.D.     | N.D.     |

\*1 Mouse: Mouse SMP30/GNL, Human: Human SMP30/GNL

\*2 Purified: purified protein, Dialyzed: dialyzed protein without chelating reagents., Chelated: dialyzed protein with chelating reagents.

\*3 Concentrations of the divalent metal ions in the sample solutions analyzed by ICP-MS.

\*4 N.D. indicates that the concentration of divalent metal ions was less than 10 ppb, which was the lower limit of detection.

\*5 Percentages of divalent metal ions calculated on a molar basis. Data are expressed as  $\mu\text{mol}$  of divalent metal ions per  $\mu\text{mol}$  of purified mouse or human SMP30/GNL.
