# Supplementary material for: Structural Basis of the γ-Lactone-Ring Formation in Ascorbic Acid Biosynthesis by the Senescence Marker Protein-30/Gluconolactonase
Source: PubMed Central journal article supplement (PMC3551927; doi:10.1371/journal.pone.0053706), 2013-01-22
Supplement: pone.0053706.s012.pdf [file pone.0053706.s012.pdf]

**Table S4.** Rms deviations ( $\text{\AA}$ ) from the least-squares fittings of mouse and human SMP30/GNL.

|         | Mouse A <sup>*</sup> | Mouse B <sup>*</sup> | Human A <sup>*</sup> | Human B <sup>*</sup> |
|---------|----------------------|----------------------|----------------------|----------------------|
| Mouse A |                      |                      |                      |                      |
| Mouse B | 0.34                 |                      |                      |                      |
| Human A | 0.62                 | 0.59                 |                      |                      |
| Human B | 0.68                 | 0.64                 | 0.42                 |                      |

\* Mouse A: mouse SMP30/GNL chain A; Mouse B: mouse SMP30/GNL chain B; Human A: human SMP30/GNL chain A; Human B: human SMP30/GNL chain B. Human SMP30/GNL coordinates determined in this study were used.

Rms deviations ( $\text{\AA}$ ) were calculated by Lsqkab in the CCP4 program suite [24]. Least-squares fittings were performed with 297 corresponding C $\alpha$  atoms.
