# Supplementary material for: Structural Basis of the γ-Lactone-Ring Formation in Ascorbic Acid Biosynthesis by the Senescence Marker Protein-30/Gluconolactonase
Source: PubMed Central journal article supplement (PMC3551927; doi:10.1371/journal.pone.0053706), 2013-01-22
Supplement: pone.0053706.s013.pdf [file pone.0053706.s013.pdf]

**Table S5.** Coordination distances and temperature factors of the divalent metal ion ( $M^{2+}$ ) and its ligand atoms in the substrate free form

|                  | Substrate free (mouse)     |         | Substrate free (human) <sup>*1</sup> |         |
|------------------|----------------------------|---------|--------------------------------------|---------|
|                  | Chain A                    | Chain B | Chain A                              | Chain B |
|                  | Distance (Å)               |         |                                      |         |
| $M^{2+}$ -Glu18  | 2.2                        | 2.3     | 2.3                                  | 2.3     |
| $M^{2+}$ -Asn154 | 2.4                        | 2.2     | 2.3                                  | 2.2     |
| $M^{2+}$ -Asp204 | 2.2                        | 2.3     | 2.3                                  | 2.2     |
| $M^{2+}$ -Wat1   | 2.4                        | -       | 2.3                                  | 2.3     |
| $M^{2+}$ -Wat2   | 2.3                        | 2.4     | 2.4                                  | 2.4     |
| $M^{2+}$ -Wat3   | 2.1                        | 2.3     | 2.3                                  | 2.4     |
|                  | B-factor (Å <sup>2</sup> ) |         |                                      |         |
| $M^{2+}$         | 32.6                       | 47.4    | 11.0                                 | 10.8    |
| Glu18            | 36.0                       | 37.6    | 18.5                                 | 23.7    |
| Asn154           | 29.4                       | 36.8    | 11.1                                 | 13.7    |
| Asp204           | 30.4                       | 29.8    | 9.6                                  | 11.5    |
| Wat1             | 34.3                       | -       | 15.8                                 | 16.9    |
| Wat2             | 31.0                       | 44.2    | 16.6                                 | 16.4    |
| Wat3             | 26.8                       | 35.4    | 11.6                                 | 14.2    |

\*1 Human SMP30/GNL coordinates determined in this study were used.
