# Supplementary material for: Structural Basis of the γ-Lactone-Ring Formation in Ascorbic Acid Biosynthesis by the Senescence Marker Protein-30/Gluconolactonase
Source: PubMed Central journal article supplement (PMC3551927; doi:10.1371/journal.pone.0053706), 2013-01-22
Supplement: pone.0053706.s014.pdf [file pone.0053706.s014.pdf]

**Table S6.** Coordination distances and temperature factors of the divalent metal ion ( $M^{2+}$ ) and its ligand atoms in the 1,5-AG complex

|                                                 | 1,5-AG (mouse)             |         | 1,5-AG (human) |         |
|-------------------------------------------------|----------------------------|---------|----------------|---------|
|                                                 | Chain A                    | Chain B | Chain A        | Chain B |
|                                                 | Distance (Å)               |         |                |         |
| $M^{2+}$ -Glu18                                 | 2.1                        | 2.2     | 2.3            | 2.3     |
| $M^{2+}$ -Asn154                                | 2.1                        | 2.2     | 2.1            | 2.1     |
| $M^{2+}$ -Asp204                                | 2.1                        | 2.3     | 2.3            | 2.3     |
| $M^{2+}$ -Asp104                                | -                          | -       | 2.4            | 2.4     |
| $M^{2+}$ -OH(2) <sub>1,5-AG</sub> <sup>*2</sup> | 2.2                        | 2.1     | 2.4            | 2.4     |
| $M^{2+}$ -OH(3) <sub>1,5-AG</sub> <sup>*2</sup> | -                          | -       | 2.5            | 2.4     |
| $M^{2+}$ -Wat1                                  | 2.2                        | 2.2     | 2.3            | 2.3     |
| $M^{2+}$ -Wat2                                  | 2.5                        | -       | -              | -       |
|                                                 | B-factor (Å <sup>2</sup> ) |         |                |         |
| $M^{2+}$                                        | 16.0                       | 24.8    | 21.8           | 19.0    |
| Glu18                                           | 23.7                       | 32.6    | 27.6           | 29.3    |
| Asn154                                          | 17.0                       | 21.0    | 25.1           | 25.5    |
| Asp204                                          | 23.4                       | 26.4    | 21.2           | 18.8    |
| Asp104                                          | -                          | -       | 21.4           | 19.6    |
| OH(2) <sub>1,5-AG</sub> <sup>*1</sup>           | 21.3                       | 22.8    | 30.7           | 28.0    |
| OH(3) <sub>1,5-AG</sub> <sup>*1</sup>           | -                          | -       | 33.5           | 24.6    |
| Wat1                                            | 25.7                       | 33.3    | 30.6           | 27.3    |
| Wat2                                            | 34.1                       | -       | -              | -       |

\*2 OH(2)<sub>1,5-AG</sub> and OH(3)<sub>1,5-AG</sub> represent a hydroxyl group at C2 and C3 of 1,5-AG, respectively.
