# Supplementary material for: Structural Basis of the γ-Lactone-Ring Formation in Ascorbic Acid Biosynthesis by the Senescence Marker Protein-30/Gluconolactonase
Source: PubMed Central journal article supplement (PMC3551927; doi:10.1371/journal.pone.0053706), 2013-01-22
Supplement: pone.0053706.s015.pdf [file pone.0053706.s015.pdf]

**Table S7.** Coordination distances and temperature factors of the divalent metal ion ( $M^{2+}$ ) and its ligand atoms in the glucose and xylitol complexes

|                                               | D-Glucose complex (mouse) |         | Xylitol complex (mouse) |         |
|-----------------------------------------------|---------------------------|---------|-------------------------|---------|
|                                               | Chain A                   | Chain B | Chain A                 | Chain B |
| Distance (Å)                                  |                           |         |                         |         |
| $M^{2+}$ -Glu18                               | 2.2                       | 2.1     | 2.2                     | -       |
| $M^{2+}$ -Asn154                              | 2.3                       | 2.4     | 2.2                     | -       |
| $M^{2+}$ -Asp204                              | 2.1                       | 2.2     | 2.1                     | -       |
| $M^{2+}$ -OH(1) <sub>Glc</sub> * <sup>3</sup> | 2.0                       | 2.0     | -                       | -       |
| $M^{2+}$ -OH(1) <sub>Xyl</sub> * <sup>4</sup> | -                         | -       | 1.9                     | -       |
| $M^{2+}$ -Wat1                                | 2.3                       | 2.2     | 2.1                     | -       |
| $M^{2+}$ -Wat2                                | 2.6                       | -       | 2.4                     | -       |
| B-factor (Å <sup>2</sup> )                    |                           |         |                         |         |
| $M^{2+}$                                      | 40.9                      | 35.4    | 19.5                    | -       |
| Glu18                                         | 33.7                      | 40.4    | 31.4                    | -       |
| Asn154                                        | 24.9                      | 28.0    | 24.0                    | -       |
| Asp204                                        | 32.7                      | 34.7    | 26.1                    | -       |
| OH(1) <sub>Glc</sub> * <sup>3</sup>           | 31.8                      | 29.3    | -                       | -       |
| OH(1) <sub>Xyl</sub> * <sup>4</sup>           | -                         | -       | 36.9                    | -       |
| Wat1                                          | 32.1                      | 33.4    | 28.1                    | -       |
| Wat2                                          | 37.6                      | -       | 31.7                    | -       |

\*<sup>3</sup> OH(1)<sub>Glc</sub> represents a hydroxyl group at C1 of D-glucose.

\*<sup>4</sup> OH(1)<sub>Xyl</sub> represents a hydroxyl group at C1 of xylitol.
