# Supplementary material for: Structural Basis of the γ-Lactone-Ring Formation in Ascorbic Acid Biosynthesis by the Senescence Marker Protein-30/Gluconolactonase
Source: PubMed Central journal article supplement (PMC3551927; doi:10.1371/journal.pone.0053706), 2013-01-22
Supplement: pone.0053706.s016.pdf [file pone.0053706.s016.pdf]

**Table S8.** RMS deviations from SSM fitting between mouse SMP30/GNL in the substrate-free form and other related structures.

| <b>Enzyme</b>                 | <b>rmsd (Å)</b> | <b>Alignment length</b> |
|-------------------------------|-----------------|-------------------------|
| mouse SMP30/GNL-1,5AG complex | 0.14            | 297                     |
| DFPase (1PJX) *               | 1.8             | 254                     |
| Drp35 (2DG1) *                | 2.1             | 250                     |
| PON (1V04) *                  | 2.9             | 234                     |

\* PDB ID is given in parentheses.
